# Supplementary material
Source: PubMed Central journal article supplement (PMC7876888)
Supplement: advancesADV2020003096-suppl1.pdf [file advancesADV2020003096-suppl1.pdf]

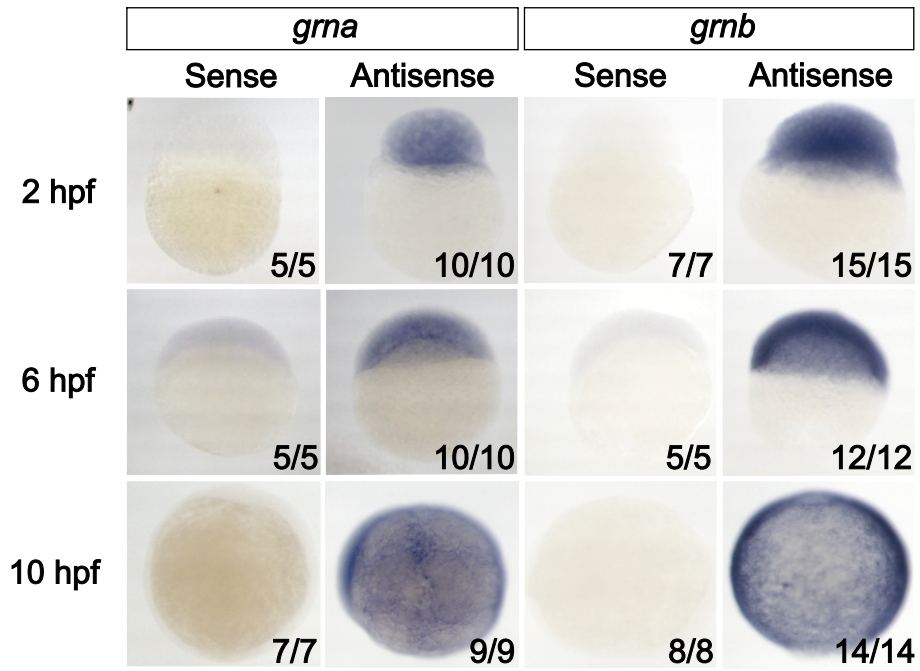

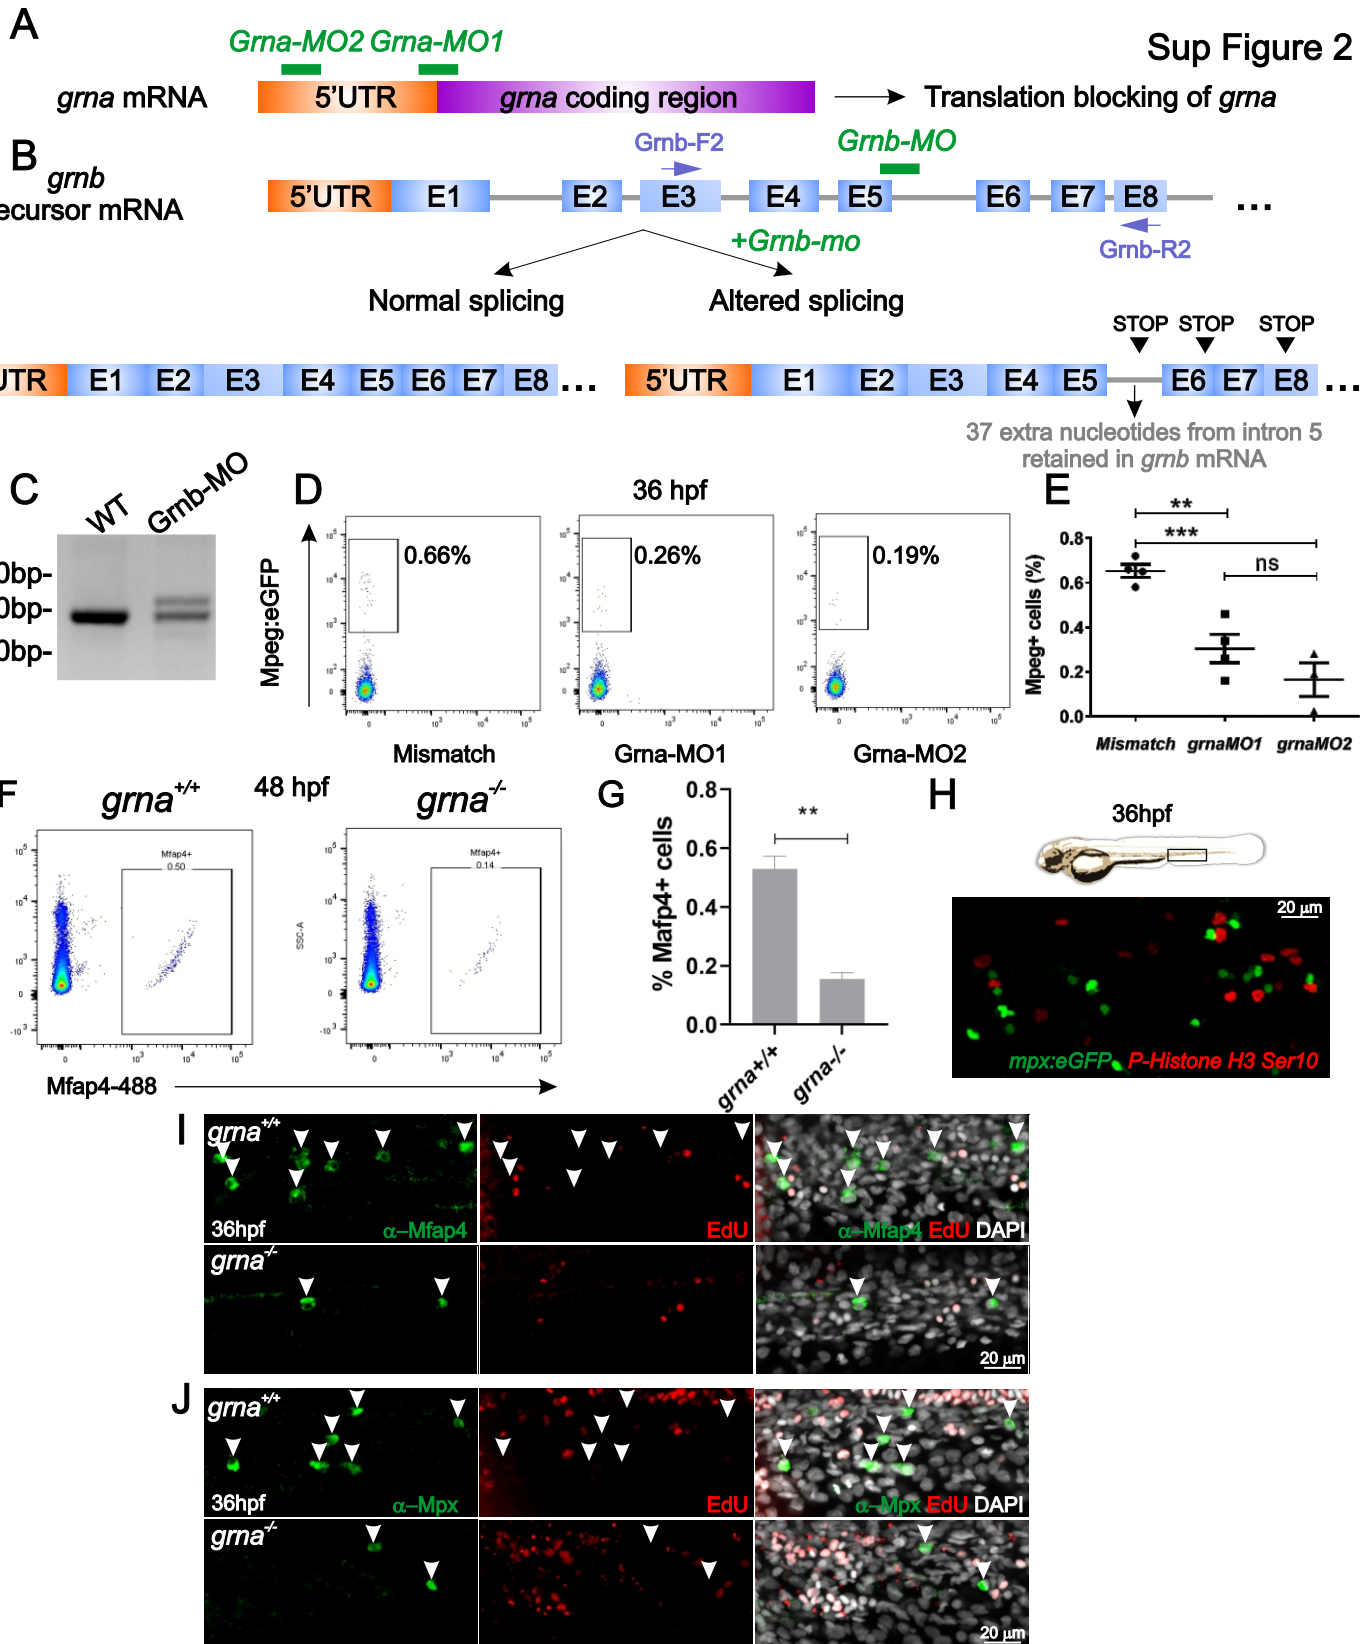

A

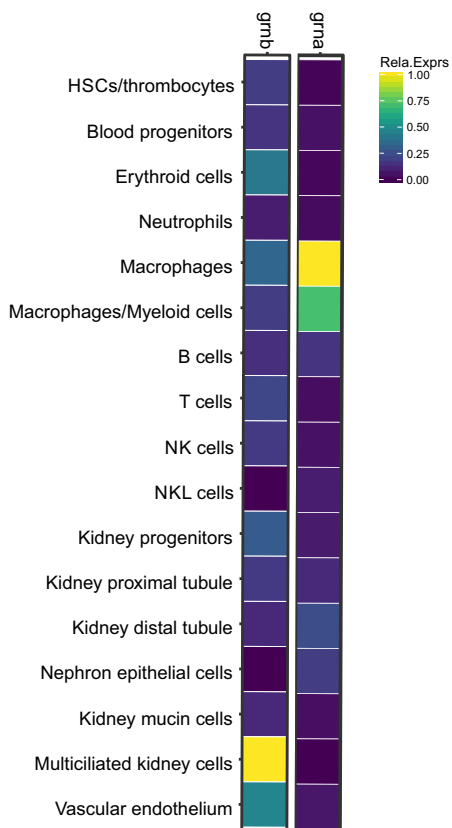

B

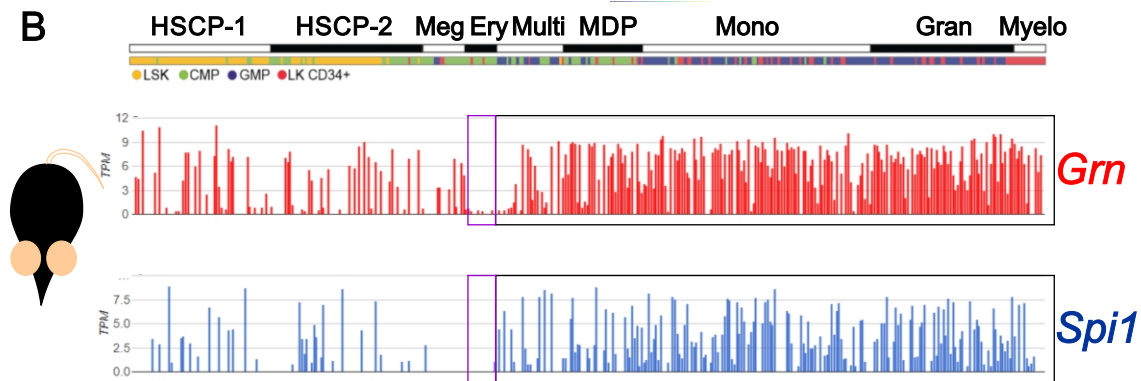

C

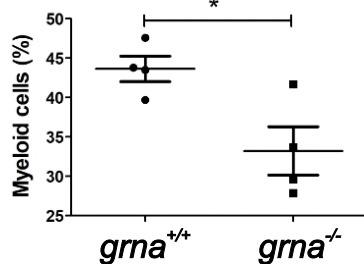

D

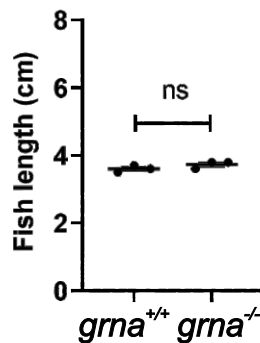

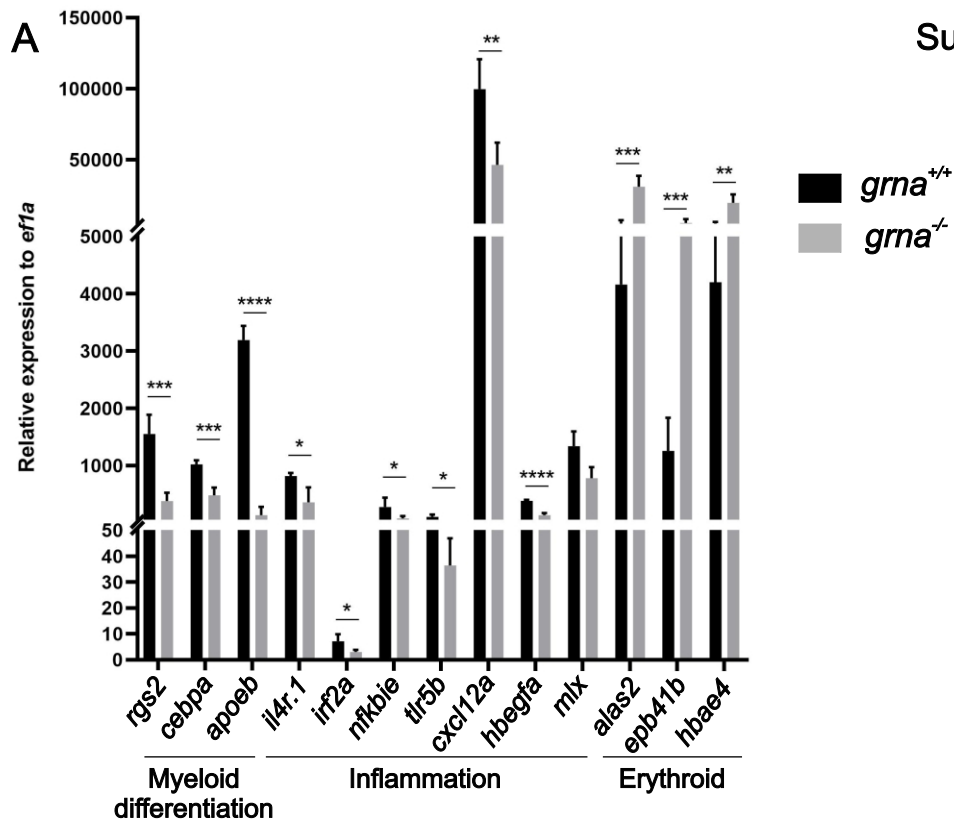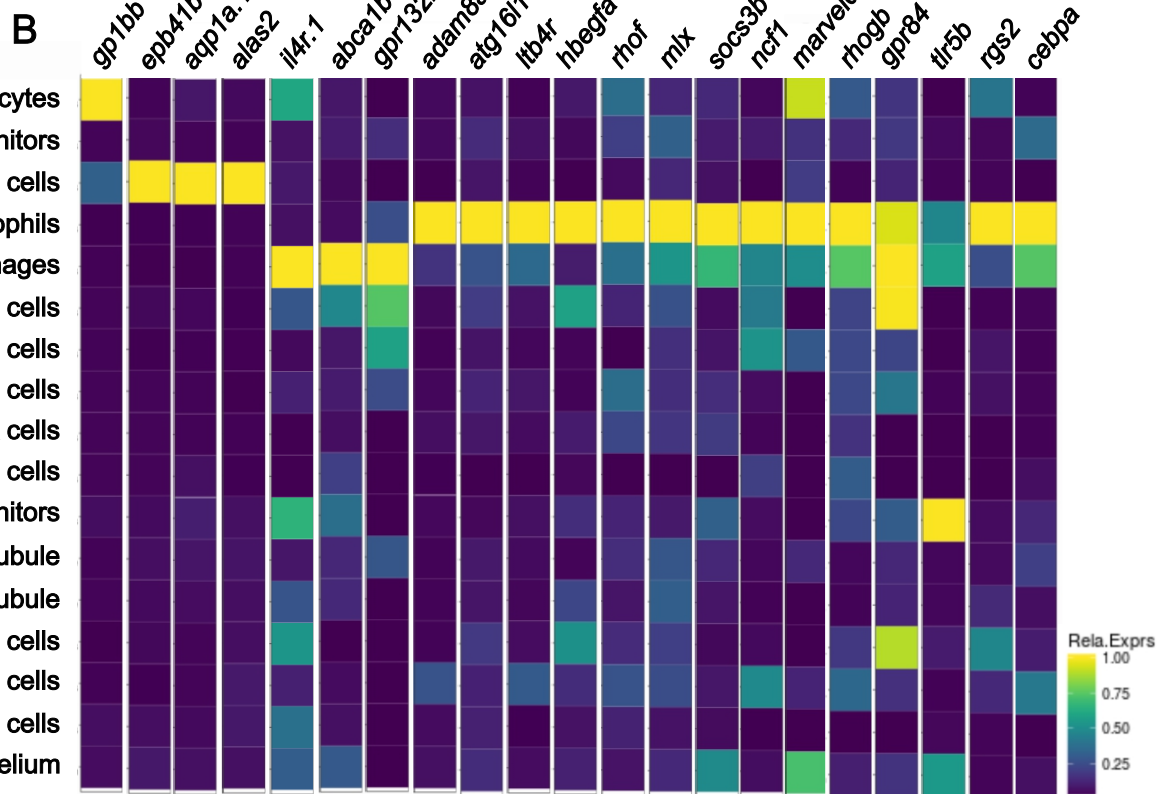

A

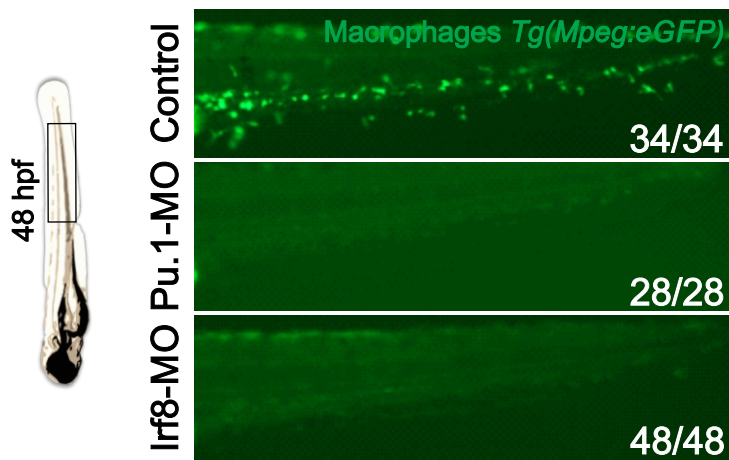

B

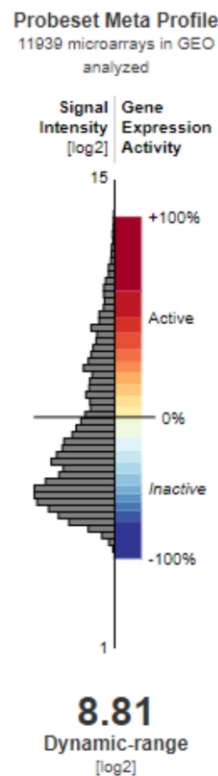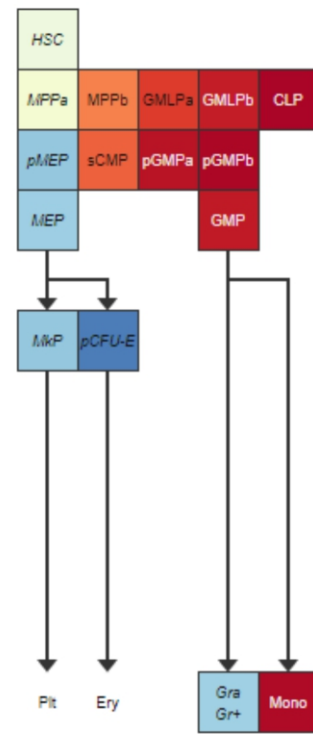

C

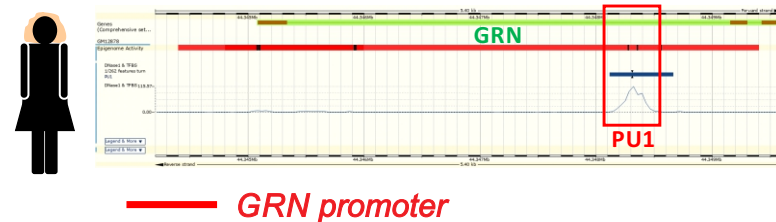

D

### Transcription factors that bind *GRN* promoter

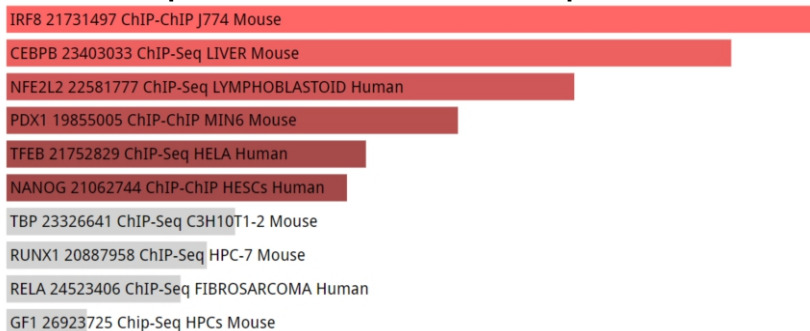

G

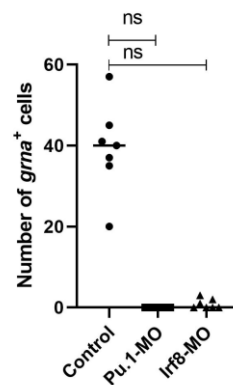

### E Transcription factors co-expressed with *GRN*

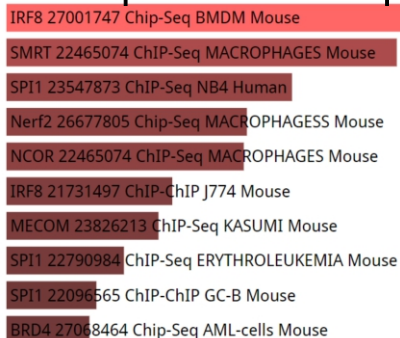

F

### Genes co-expressed with *GRN*

| Gene Symbol | r | Pearson Correlation |
|-------------|---|---------------------|
| CTSD        |   | 0.675               |
| CD68        |   | 0.6584              |
| MPEG1       |   | 0.6148              |
| CTSB        |   | 0.6039              |
| CTSA        |   | 0.5907              |
| TREM2       |   | 0.5775              |
| C3AR1       |   | 0.5674              |
| CTSZ        |   | 0.564               |
| LGALS3      |   | 0.554               |
| LIPA        |   | 0.5415              |

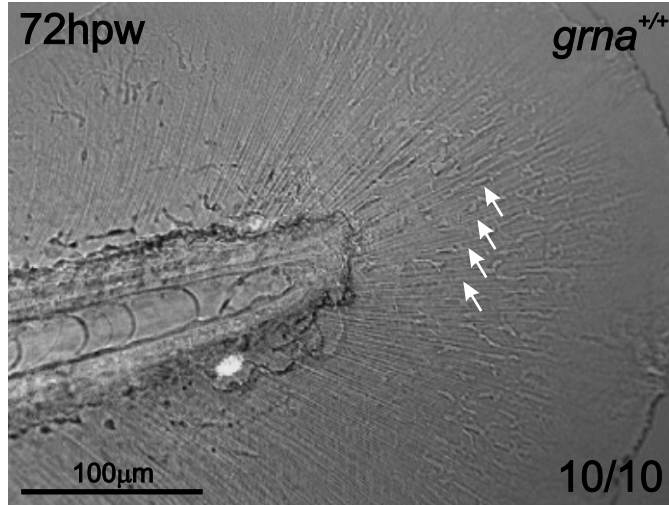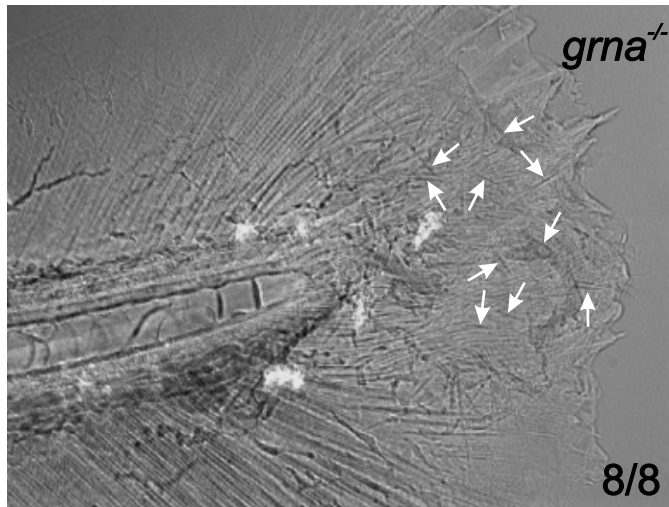

**Supplementary Figure 1: *grna* and *grnb* transcripts are ubiquitously expressed during early zebrafish embryonic development.** WISH of 2, 6 and 10 hpf AB\* zebrafish embryos hybridized with *grna* antisense and control sense probes (left panel), or *grnb* antisense and control sense probes (right panel). Numbers represent embryos with indicated expression.

**Supplementary Figure 2: *grna* knockdown impairs macrophage development. (A-B)** Schematic illustration of the *grna* and *grnb* knock-out and strategies. **(A)** Grna-MO1 and Grna-MO2 are 5'UTR-ATG translation blocking morpholinos. **(B-C)** Efficiency of splice-blocking MO against zebrafish *grnb*. RT-PCR analysis of WT and Grnb-MO injected embryos induced altered splicing of the *grnb* transcripts at 24 hpf. A 535 bp product containing 37 nucleotides insertion from *grnb* intron 5 (upper band) was detected in contrast to a 498 bp control (lower band in Grnb-MO injected embryos and WT control). This leads to an aberrant *grnb* mature mRNA with a shift in reading frame, which results in premature stop codons along the *grnb* mRNA. The annealing of MOs (green lines) and the inframe premature stop codons (arrowheads) are indicated. **(D)** Representative dots plots of 36hpf *Mpeg1.1:eGFP* embryos injected with mismatch, Grna-MO1 and Grna-MO2. **(E)** Quantification of Mpeg<sup>+</sup> macrophages in Mismatch control n=4, Grna-MO1 n=4, and Grna-MO2, n=3 embryos. Each dot represents the percentage of Mpeg<sup>+</sup> cells from the total events from 3 embryos. Horizontal lines and error bars indicate means  $\pm$  SEM (\*\*p<0.01, \*\*\*p<0.001, ns: no significant). **(F-G)** Representative dot plot of intracellular flow cytometry using a specific antibody against the macrophage marker Mfap4 at 48 hpf *grna*<sup>+/+</sup> (left) or *grna*<sup>-/-</sup> embryos (right). Quantification shown in **(G)**. **(H)** WIHC for eGFP (green) and phospho-Histone 3 (Ser10) (red) in the caudal hematopoietic tissue of 36 hpf *Mpx:eGFP* embryos shows lack of colocalization between both markers. **(I-J)** Confocal images from 36 hpf *grna*<sup>-/-</sup> or *grna*<sup>+/+</sup> control embryos show incorporation of EdU (red) into the CHT between 26 and 36 hpf., Macrophages **(I)**

or neutrophils (**J**) are marked by immunofluorescence for Mfap4 or Mpx (green), respectively. White nuclei are stained with DAPI. White arrowheads represent macrophages (I) or neutrophils (J).

**Supplementary Figure 3: Conserved gene expression levels among zebrafish *grna* and mouse *Grn* in hematopoietic cells.** (A) Heat map derived from the online visualizer “Single Cell inDrops RNA-Seq Visualization of Adult Zebrafish Whole Kidney Marrow” (<https://molpath.shinyapps.io/zebrafishblood/#pltly>) (Tang *et al.*, 2017) for *grna* and *grnb* showing low or inexistent expression of *grnb* by kidney marrow hematopoietic cells and high expression by multiciliated kidney cells and vascular endothelium. In contrast, *grna* is highly expressed by macrophages and myeloid cells. (B) Gene expression levels in Transcripts Per Kilobase Million (TPM) for Granulin (*Grn*, red) and Pu.1 (*Spi1*, blue) from single cell RNA-seq data of mouse hematopoietic cells (Olsson *et al.*, 2016) showing high correlation between *Grn* and *Spi1* expression. (C) Quantification of the percentage of myeloid cells gated in Figure 3C in *grna*<sup>+/+</sup> (n=4) and *grna*<sup>-/-</sup> (n=4) zebrafish kidney marrows. (D) Quantification of zebrafish body length of *grna*<sup>-/-</sup> and *grna*<sup>+/+</sup> control siblings. Horizontal lines and error bars indicate means ± SEM. Ns, not significant; \*p < 0.05. HSCP, Haematopoietic Stem Cell Progenitor; Meg, megakaryocytic; Ery, erythrocytic; Multi, Multi-lineage primed; MDP, monocyte-dendritic cell precursor; Mono, monocytic; Gran, granulocytic; Myelo, myelocyte (myelocytes and metamyelocytes).

**Supplementary Figure 4: *Grna* depletion leads to decreased expression of myeloid specific genes and increased erythroid genes in the kidney marrow.** (A) Kidney marrows were dissected from *grna*<sup>-/-</sup> and control *grna*<sup>+/+</sup> siblings and mRNA purified for qPCR. Levels of indicated transcripts along x-axis are shown relative to the housekeeping gene *ef1a*. Bars represent means ± S.E.M. of duplicate samples. (B) Heat map of the relative gene expression derived from



the online visualizer “Single Cell inDrops RNA-Seq Visualization of Adult Zebrafish Whole Kidney Marrow” (<https://molpath.shinyapps.io/zebrafishblood/#pltly>) (Tang *et al.*, 2017) of genes significantly enriched (A) or depleted (B) from RNA-seq of *grna*<sup>-/-</sup> versus *grna*<sup>+/+</sup> kidney marrows.

**Supplementary Figure 5: Conserved regulatory expression of granulin in mammals and zebrafish.** (A) *Mpeg1:eGFP* transgenic embryos were injected with control (Std), Pu.1, or Irf8 MOs and the tail region was visualized by fluorescence microscopy at 48 hpf. (B) Mouse hematopoietic model showing the dynamic expression of *Irf8* derived from microarray data (Affymetrix Mouse Genome 430 2.0 Array). Notice that lymphocyte differentiation beyond CLP is not shown here. (C) Screenshot of the regulatory feature of *ensembl.org* showing that PU.1 binds the *GRN* promoter in human hematopoietic cell lines based on epigenetic marks from experimental data available through *ensembl.org*. (D) Screenshot of mammalian granulin queried by ChEA showing the transcription factors whose peaks were detected at the granulin promoter. TFs were ranked based on p-value (red colors indicate p<0,05; gray colors indicate p>0,05). (E) Results from Harmonizome combined with ChEA showing the TFs that were co-expressed with the mammalian granulin. TFs were ranked based on p-value (red colors indicate p<0,05). (F) Screenshot of mammalian granulin queried by Harmonizome (<https://amp.pharm.mssm.edu/archs4/gene/GRN#correlation>) showing the first 10 most similar genes based on co-expression ranked by descendent Pearson correlation. HSC, Hematopoietic Stem Cell; MPP, Hematopoietic multipotential progenitors; GMLP, granulocyte–monocyte–lymphoid progenitor; CLP, common lymphoid progenitor; pMEP, pre of megakaryocyte-erythroid progenitor; MEP, megakaryocyte-erythroid progenitor; MkP, Megakaryocyte progenitor; PCFU-e, Colony Forming Unit-Erythroid; Plt, platelets; Ery, Erythrocytes; sCMP, strict common myeloid progenitor; pGMP, pre-granulocyte/macrophage; GMP, granulocyte/macrophage progenitors; Gra

Gr<sup>+</sup>, granulocytes; Mono, monocytes. **(G)** Quantification of *grna* expressing cells per embryo in the caudal hematopoietic tissue after pU.1 or Irf8 ablation using specific morpholinos (Figure 5B).

**Supplementary Figure 6: Abnormal tissue repair in the absence of *grna*.** Regenerated tail fins from *grna*<sup>+/+</sup> and *grna*<sup>-/-</sup> larvae at 72 hpw. Numbers represent larva with displayed phenotype.

**Table S1**

| <b>Gene or locus</b>    | <b>Accession</b> | <b>Name</b>              | <b>Nucleotide sequence (5'→3')</b> | <b>Use</b>              |
|-------------------------|------------------|--------------------------|------------------------------------|-------------------------|
| <i>ef1a</i>             | NM_131263.1      | F                        | GAGAAGTTCGAGAAGGAAGC               | q-PCR                   |
|                         |                  | R                        | CGTAGTATTTGCTGGTCTCG               |                         |
| <i>grna</i>             | NM_001001949.3   | F                        | AGCCAGACCTTCCCAAATCAT              |                         |
|                         |                  | R                        | CTCAGCAGGACAGGAAGAGC               |                         |
| <i>grnb</i>             | NM_212738.1      | F                        | CGGCAAGAGTCTGGAAGAGT               |                         |
|                         |                  | R                        | CACACGGCCTTGACTAGAGG               |                         |
| <i>grnb</i>             | NM_130944.1      | F2-MO                    | AAC TTTGTGCGACCTGGAAC              | Morpholino validation   |
|                         |                  | R2-MO                    | TCTGGACAGCAGTGCTTTTG               |                         |
| <i>grna</i>             | NC_007114.7      | pU.1-BS1-F               | CACGAAAAGCCGA ACTCT                | CUT&RUN-qPCR            |
|                         |                  | pU.1-BS1-R               | GTTGGTCAGGCCTTTGAC                 |                         |
| <i>grna 5' enhancer</i> | NC_007114.7      | pU.1-BS2-F               | GCAGACAAAAGAGGAAAGAAGC             |                         |
|                         |                  | pU.1-BS2-R               | ACAGAACAGATCCTGATG                 |                         |
| <i>grna 5' enhancer</i> | NC_007114.7      | pU.1-BS3-F               | GCAGATGATGATGTAAAAAAGGG            |                         |
|                         |                  | pU.1-BS3-R               | CACATTTCTTTTACTTAACGC              |                         |
| <i>grna</i>             | NC_007114.7      | Control-F                | TGTCTTCTGATCTCAGTTCT               |                         |
|                         |                  | Control-R                | GAGATAGACACGTACAGTTTG              |                         |
| <i>grna 5' enhancer</i> | NC_007114.7      | pU.1-BS5-F               | GTTTCACGTAGCGGAAGC                 |                         |
|                         |                  | pU.1-BS5-R               | GGGTTGTGGCTGAAAAGG                 |                         |
| <i>grna</i>             | NC_007114.7      | pU.1-BS6-F               | GCGAGTTTGAGCCACTTG                 |                         |
|                         |                  | pU.1-BS6-R               | CCTGATCACTTCCGGGAT                 |                         |
| <i>grna</i>             | NC_007112.7      | pU.1-BS7-F               | CACTGCCAACTAGCGTTTC                |                         |
|                         |                  | pU.1-BS7-R               | ACTGCATTAACACTTCCGA                |                         |
| <i>rgs2</i>             | NM_001002662.2   | rgs2-qPCR-219-F          | GTTGGCCTGTGAGGAGTTCAGA             | Validation mRNAseq-qPCR |
|                         |                  | rgs2-qPCR-219-R          | TAGGAGTTGTGCTCCATCAGGT             |                         |
| <i>cebpa</i>            | NM_131885.2      | cebpa -qPCR-165-F        | CTCAGTGTCTAATTTCGTGCGAC            |                         |
|                         |                  | cebpa -qPCR-165-R        | GATTCTGGTTTCCAGCTTACTC             |                         |
| <i>apoeb</i>            | NM_131098.2      | Apoeb_qPCR_206bp_F       | TGCAAGAGCTGAAGACCATGAT             |                         |
|                         |                  | Apoeb_qPCR_206bp_R       | CTGGCTCATGTATGGCTGGAA              |                         |
| <i>il4r.1</i>           | NM_001013282.2   | il4r.1-qPCR-F            | TCCACAAAGGTGGCAAACAC               |                         |
|                         |                  | il4r.1-qPCR-R            | GCGCTTACAATCCAGTGGTG               |                         |
| <i>irf2a</i>            | NM_001326712.1   | irf2a -qPCR-F            | TGAAAAAGCTGTTAGGAAAGGAAG           |                         |
|                         |                  | irf2a -qPCR-R            | TGGTCATGCGTTCTACTTTTG              |                         |
| <i>nfkbie</i>           | NM_001080089.1   | nfkbie-201_qPCR_199b_p_F | TCCAGGACCAGGATGGAAACA              |                         |

|                |                |                                 |                          |
|----------------|----------------|---------------------------------|--------------------------|
|                |                | nfkbie-<br>201_qPCR_199b<br>p_R | TTCTTCATCAGCAGCCGCATGA   |
| <i>tlr5b</i>   | NM_001130595.2 | tlr5b-qPCR-F                    | GATAGATGATCCGTGCTCACA    |
|                |                | tlr5b-qPCR-R                    | ACGACTTCAGTGTTTCAGGCA    |
| <i>cxcl12a</i> | NM_178307.2    | cxcl12a-qPCR-<br>175-F          | ACCCAGAGACCAAATGGCTTCA   |
|                |                | cxcl12a-qPCR-<br>175-R          | AGGTTAAGTGCTGGGTCAGCAA   |
| <i>hbegfa</i>  | NM_001111226.1 | hbegfa-<br>002_qPCR_119b<br>p_F | ACAAGGACTTTTGCATCCACG    |
|                |                | hbegfa-<br>002_qPCR_119b<br>p_R | CTTCACCGGCAGAGAGAAATC    |
| <i>mlx</i>     | NM_001309416.1 | mlx_qPCR_151b<br>p_F            | ACTCTCTGTTCCAGTCCTTCAG   |
|                |                | mlx_qPCR_151b<br>p_R            | AGTTGACCATTACCTGCTGC     |
| <i>alas2</i>   | NM_131682.2    | alas2-<br>201_qPCR_150b<br>p_F  | CTTTAAGGAGAGCCCATCAGAG   |
|                |                | alas2-<br>201_qPCR_150b<br>p_R  | CCAACAGAATATCACACACCTCC  |
| <i>epb41b</i>  | NM_175084.2    | epb41b- qPCR-<br>196-F          | ATCCATTACGGTGGCAACACAC   |
|                |                | epb41b- qPCR-<br>196-R          | CCTTCTTTCTTCCTCCAGTTTCC  |
| <i>hbae4</i>   | NM_001082834.1 | hbae4-qPCR-F                    | TGCTCTCGAGTGCCGAAAA      |
|                |                | hbae4-qPCR-R                    | GGAACGTTGTGAACATCCTTAAAA |

**Table S2: List of genes down-regulated in *grna*<sup>-/-</sup> versus *grna*<sup>+/+</sup>**

agpat4  
larp6  
zgc:153993  
cebpa  
far1  
tpst1  
arrb2a  
zgc:66427  
podxl  
sepn1  
f2r  
grna  
hk1  
rbp5  
cybrd1  
sall1a  
cxcl12a  
amd1  
trim8a  
atg16l1  
hbegfa  
il13ra2  
si:rp71-1g18.13  
mlx  
pitpnaa  
cd81b  
zgc:171579  
si:dkey-20d21.12  
slc16a3  
ets1  
slc35d1a  
hsd3b7  
dlc  
syb1  
papss2a  
rhof  
ltb4r  
irf2a  
ccdc149b  
ncaldb  
adam8a  
hyal3  
cers5  
ncf1  
enpp1  
tlr5b  
rbm48  
pgp

zgc:55558  
odc1  
cd9b  
wt1b  
illr4  
c6  
mid1ip1b  
ero1a  
ippk  
rhogb  
rgs2  
nfkbie  
chsy3  
mfsd2ab  
agpat9l  
rxrga  
zgc:103510  
soat1  
plekhf1  
nphs1  
spry4  
socs3b  
efhd1  
lima1a  
cp  
ahsg1  
il13ra1  
marveld1  
lyve1a  
ankrd37  
lmo4b  
zgc:77112  
b3gnt5b  
pigrl2.3  
itgb3a  
tank  
abca1b  
emilin1a  
rpz3  
zfand6  
nphs2  
gpr132b  
cldn5b  
prss35  
gig2h  
stab2  
si:ch211-132b12.6  
hnmt  
si:ch211-264f5.2  
gig2g  
lpar5b

nr1h5  
zgc:174888  
dhrs3a  
si:dkey-25e12.3  
vtg7  
ccl19a.1  
si:dkey-61p9.11  
gpr84  
si:ch1073-67j19.1  
scube1  
foxd2  
nfe2l1a  
crfb17  
htra3a  
rspo1  
coch  
zgc:162952  
zgc:92161  
vtg1  
tcf21  
il4r.1  
si:dkey-91m11.5  
cyp1c2  
m17  
slc25a15a  
zgc:152863  
adra1bb  
vtg4  
rspo3  
gig2j  
si:ch73-86n18.1  
sult5a1  
zgc:158404  
slc22a16  
pltp  
zgc:101699  
cxcl8b.1  
dio3b  
vtg6  
olfm2b  
cyp26b1  
serpine1  
ugt5g1  
sp5a  
hamp  
apoeb  
cidec  
dpep1  
zgc:172053  
g0s2  
lgi2b

si:dkeyp-73d8.9  
vtg3  
tfa  
f13a1a.1

**Table S3: List of genes up-regulated in *grna*<sup>-/-</sup> versus *grna*<sup>+/+</sup>**

zgc:172090  
lmod2a  
ddc  
cyp7a1  
frem2a  
lgals2b  
slc51a  
slc25a38a  
si:dkeyp-91i10.3  
nsmfb  
dio2  
zgc:158427  
mao  
si:rp71-1f1.4  
zgc:64106  
zgc:77651  
grm8b  
alle  
pcyt1ba  
si:dkeyp-98a7.5  
igfbp5a  
csad  
si:dkeyp-89c11.2  
slc6a14  
adrb2b  
si:dkeyp-89c11.3  
ela2l  
si:ch211-197g15.10  
unc119b  
slco1f1  
slc16a12b  
irs2a  
si:ch73-359m17.2  
tal2  
fbxo25  
oxr1b  
hsc70  
zgc:86896  
adrb3b  
tnmem63bb  
sox6  
aadacl4  
cnstb  
aldh3a2b



slc52a3  
gch2  
krt15  
ctsbb  
tppp3  
nt5c211  
nad1.2  
zgc:162780  
dpysl3  
fbxo32  
slc6a13l  
rhcgb  
cdc25d  
si:ch73-55i23.1  
hexdc  
mibp  
tuba2  
fam65c  
nrp2b  
creg1  
harbi1  
si:ch211-194e15.5  
aplrb  
rell2  
zgc:198419  
hif1a2  
guca2b  
adrb3a  
adssl1  
si:ch211-5k11.6  
bag5  
spns2  
si:ch211-114i13.9  
rnf183  
si:dkey-58f10.11  
suox  
ank1a  
ucp3  
mfge8a  
sstr5  
dydc2  
ascc1  
cipca  
slc25a39  
3-Sep  
fbxo3  
jag1b  
entpd8  
epb41b  
zgc:123107  
si:dkey-58f10.10

zgc:194125  
alas2  
zgc:163057  
hbp1  
slc43a3a  
zgc:172143  
zgc:76872  
p2rx3b  
zgc:173915  
zgc:153018  
sdpra  
sat1a.1  
zgc:66440  
gp1bb  
tcp1112  
aqp1a.1  
slc12a3  
ube2r2  
dfna5b  
fam46c  
pip5k1bb

**Table S4: List of genes down-regulated in *grna*<sup>-/-</sup> versus *grna*<sup>+/+</sup> expressed in myeloid cells**

abca1b  
adam8a  
agpat4  
agpat9l  
amd1  
apoeb  
arrb2a  
atg16l1  
b3gnt5b  
cebpa  
cers5  
cldn5b  
cybrd1  
cyp26b1  
enpp1  
far1  
gig2h  
gpr132b  
gpr84  
grna  
hamp  
hbegfa  
hk1  
hsd3b7  
hyal3  
il13ra1  
il4r.1

irf2a  
itgb3a  
larp6  
lima1a  
ltb4r  
marveld1  
mid1ip1b  
mlx  
ncaldb  
ncf1  
nfkbie  
odc1  
papss2a  
pgp  
pitpnaa  
plekhf1  
rbp5  
rgs2  
rhof  
rhogb  
sall1a  
serpine1  
slc16a3  
slc25a15a  
slc35d1a  
socs3b  
spry4  
stab2  
sult5a1  
sybl1  
tfa  
tlr5b  
tpst1  
cxcl12a  
cp  
podxl  
dlc

**Table S5: List of genes up-regulated in *grna*<sup>-/-</sup> versus *grna*<sup>+/+</sup> expressed in erythroid cells**

ascc1  
cipca  
slc25a39  
sep t3  
fbxo3  
jag1b  
entpd8  
epb41b  
zgc:123107  
si:dkey-58f10.10  
zgc:194125

alas2  
zgc:163057  
hbp1  
slc43a3a  
zgc:172143  
zgc:76872  
p2rx3b  
zgc:173915  
zgc:153018  
sdpra  
sat1a.1  
zgc:66440  
gp1bb  
tcp1112  
aqpl1a.1  
slc12a3

## Extended materials and methods

### *Zebrafish husbandry and strains*

Mutant *grna*<sup>*mde54a1*</sup>, transgenic *Tg(mpx:eGFP)*<sup>*i114*</sup><sup>2</sup>, *Tg(gata1:DsRed)*<sup>*sd2*</sup><sup>3</sup>, *Tg(mpeg1:eGFP)*<sup>*gl22*</sup><sup>4</sup>, *Tg(kdrl:HsHRAS-mCherry)*<sup>*s896*</sup> (referred to as *kdrl:mCherry* throughout manuscript)<sup>5</sup>, *Tg(Lyz:Dsred2)*<sup>*nz50*</sup><sup>6</sup>, *Tg(Myf5:eGFP)*<sup>*zf42*</sup><sup>7</sup>, *Tg(LCR:eGFP)*<sup>*cz3325*</sup><sup>8</sup> and various intercrosses of these lines were utilized.

### *Morpholino injection*

Specific antisense morpholinos (MOs) (Gene Tools) were resuspended in water at 2mM. MOs used in this study were Standard-MO (Gene Tools), pu1-MO<sup>9</sup>, irf8-MO<sup>10</sup>, Grna-MO1 (also denoted as Grna-MO throughout the manuscript) 5'-TTGAGCAGGTGGATTTGTGAACAGC-3'<sup>11</sup>, Grna control morpholino with 5 nucleotides mismatch 5'-TTGACCACGTGCATTTCTCAACAGC-3', Grna-MO2 5'-GGAAAGTAAATGATCAGTCCGTGGA-3'<sup>11</sup>, and Grnb-MO 5'-CCACAGCGCAACTCTCACACCTG-3' (validated in this manuscript). Morpholinos were diluted in water at a concentration of 0.4 mM (Grna-MO), 0.4 mM (Grna mismatch-MO), 0.2 mM (Grna-MO2), 0.6 mM (Grnb-MO), 1.4 mM (irf8-MO) and 2 mM (pu1-MO) with phenol red solution and 2 nl were injected into the yolk ball of one-cell-stage embryos using a micromanipulator (Narishige) and PM 1000 cell microinjector (MDI). For Grnb-MO validation, 20 24 hpf zebrafish embryos injected with Grnb-MO or uninjected controls were collected and RNA was isolated with RNeasy (Qiagen), cDNA generated with qScript Supermix (Quanta BioSciences) and PCR performed with primers Grnb-F2-MO and Grnb-R2-MO (Table S1) for the detection of the wildtype (498 bp) or the mutant (535 bp) *grnb* amplicon. These amplicons were

sequenced. The mutant *grnb* amplicon contained 37 extra-nucleotides that changed the reading frame of the *grnb* mRNA.

### ***Quantitative RT-PCR analysis***

RNA was isolated from tissues with RNeasy (Qiagen), and cDNA generated with iScript gDNA Clear cDNA Synthesis Kit (BioRad). Primers to detect zebrafish transcripts are described in Table S1. qPCR was performed in CFX real-time PCR detection system (BioRad), and relative expression levels of genes were calculated by the following formula: Relative expression =  $2^{-(Ct[\text{gene of interest}] - Ct[\text{housekeeping gene}])}$ .

### ***Flow cytometry***

To quantify the myeloid fraction in kidney marrows from *grna*<sup>-/-</sup> and *grna*<sup>+/+</sup> control siblings, adult zebrafish between three to nine months old were anesthetized in tricaine, subjected to cardiocentesis and kidney dissection as previously described<sup>3</sup>. The resulting kidney suspension was gently triturated with a P1000 pipette and filtered with a 30µm cell strainer (Thermo Fisher Scientific, NC9084441) and stained with Sytox Red (Life Technologies) to exclude dead cells. Flow cytometric acquisitions were performed on a LSR-Fortessa (BD) and analyses were performed using FlowJo software (v10.3, Tree Star) as previously described<sup>3</sup>.

To analyze macrophage numbers in Grna morphants, three 48 hpf *Mpeg1:eGFP*<sup>+</sup> embryos per replicate (three to four replicates per experiment) previously injected with Grna-MO1, Grna-MO2 or Grna mismatch MO were dechorionated with pronase (Roche) and anesthetized in tricaine. Gently triturated with a P1000 pipette and chemically dissociated with liberase TM (Roche) for 20 minutes in agitation. The resulting cell suspension was filtered and stained with Sytox Red to exclude dead cells. Flow cytometric acquisitions were performed on a FACS LSR-

Fortessa (Becton Dickinson) and analyses were performed using FlowJo software (v10.3, Tree Star).

For intracellular flow cytometry, flow cytometry was performed on a LSR Fortessa (BD) and data were analyzed using FlowJo software (v10.3, Tree Star). Following dissociation of 48 hpf *grna*<sup>+/+</sup> and *grna*<sup>-/-</sup> embryos (three embryos per condition) with liberase TM (Roche) as described below, cells were fixed with PFA 4% and permeabilized for 30 minutes on ice with PBS containing 0.1% triton. Intracellular staining was performed with anti zebrafish mfap4 antibody (Gentex, GTX132692), dilution 1:250, followed by staining with 5ug/ml of goat anti-rabbit IgG (H+L) antibody, alexa-488 (Thermo Fisher, A11034).

To isolate embryonic cells by FACS (*Fluorescence-activated cell sorting*) for qPCR analysis, approximately 200 16 hpf *Myf5:eGFP*<sup>+</sup>; 22 hpf *Kdr11:mCherry*<sup>+</sup>, *Gata1:Dsred*<sup>-</sup>; 48 hpf *Mpx:eGFP*; 48 *Mpeg1:eGFP*; or 36 hpf *LCR:eGFP* embryos were dechorionated with pronase (Roche) and anesthetized in tricaine. Gently triturated with a P1000 pipette. The resulting cell suspension was filtered and stained with Sytox Red to exclude dead cells. Cell sorting of positive fluorescent cells was performed with a FACS ARIAI (Becton Dickinson).

### ***In Situ Hybridization***

Reagents used for FISH: TSA Plus Cyanine 3/Fluorescein system (NEL753001KT), anti-Digoxigenin-POD, Fab fragments (11207733910), and anti-fluorescein-POD, Fab (11426346910). Embryos were analyzed using a Sp5 confocal (Leica). Embryos were imaged using a Leica M165C stereomicroscope equipped with a DFC295 color digital camera (Leica) and FireCam software (Leica) for WISH, and Sp5 confocal (Leica) for FISH.

### ***Whole-mount immunohistochemistry, EdU incorporation assay and TUNEL***

The following antibodies were used: rabbit anti-phospho-Histone H3 (Ser10) antibody (Millipore, 06-570) (dilution 1:100), anti-GFP antibody chicken IgY (Aves Labs GFP-1020) (dilution 1:500), goat anti-Chicken IgY (H+L) Alexa-488 (Thermofisher A-11039) (dilution 1:500), donkey anti-rabbit IgG (H+L) Alexa-594 (Thermofisher A21207) (dilution 1:500). The samples were imaged with a Leica Sp5 confocal.

Our EdU incorporation assay was adapted from a previously described protocol<sup>12</sup>: Mutant and wild-type siblings were injected pericardially with 1 nl EdU solution (200  $\mu$ M EdU, 2% DMSO, 0.1% phenol red) at 24 hpf, followed by fixation at 36 hpf. Whole-mount immunostaining was adapted from a previously described protocol<sup>13</sup>, followed by Click-iT detection as per manufacturer's guidelines (Invitrogen, C10340). Antibodies used include rabbit polyclonal anti-Mfap4 (1:100; GTX132692) or rabbit anti-Mpx (1:100, GTX128379), followed with Alexa Flour 488 goat anti-rabbit (1:200, A-21206) and DAPI (1:500, Invitrogen; D1306). Imaging of the CHT was performed with a Zeiss LSM 700 confocal microscope with Zen9 software and images were processed with ImageJ.

The TUNEL assay was performed as previously described<sup>13</sup> with the following modification: Streptavidin-Alexa647 (Jackson Laboratories; 016-600-084) was used for the detection of apoptotic cells.

### ***Fin amputation and enumeration of myeloid cells***

48hpf zebrafish embryos were anesthetized with tricaine and a single cut traversing the entire dorsoventral length of the caudal fin was made using a surgical scalpel size #15 (19-200-218, fisher scientific). Embryos were individually isolated and imaged at each given timepoint. Throughout the time course, the initial amputation plane of each embryo was determined by superimposing the



image captured at each timepoint with the image of the initial cut using Adobe Photoshop CS6. The caudal-most tip of notochord was used as a landmark for spatial alignment. Quantification of regenerate area was determined using ImageJ.

Animals were subjected to WISH for *pu.1* (myeloid progenitors), *mfap4* (macrophages), or *mpx* (neutrophils) at 48 hpf at varying locations (tail or head, listed in figures) and cells expressing the above mentioned transcripts were imaged and manually counted per individual. To image and enumerate macrophages *in vivo* after tail resection, fluorescence microscopy was performed on *Mpeg1:eGFP* transgenic animals. Z-sections of the tail region were captured using Leica Thunder imager with DFC9000 GT camera and LAS X navigator, and manually counted.

### ***Cytology***

Cytospin preparations were made with  $1 \times 10^5$  to  $2 \times 10^5$  kidney cells cytocentrifuged at 300 rpm for 5 min onto glass slides in a Thermo Scientific Shandon CytoSpin 4. Cytospin preparations were processed through Wright-Giemsa stains (Fisher Scientific, 5029782) for morphological analyses and differential cell counts. Briefly: Wright Stain Solution was placed upon the smear for 2 mins and washed with distilled water. Subsequently, the slides were placed for 10 minutes in a coplin jar containing Giemsa and rinsed with distilled water.

### ***Morphological analyses and differential cell counts of kidney marrow hematopoietic cells***

200 non-erythroid nucleated differential cell counts were assessed in *grna*<sup>-/-</sup> or *grna*<sup>+/+</sup> kidneys after cardiocentesis, kidney dissection, cytospin and staining with Wright-Giemsa. The morphological features to identify each cell type are the following. Early myeloid precursors, round to ovoid in shape with a round to ovoid-shaped pink nucleus. Chromatin pattern finely granular and semi frequently with distinct round nucleoli. High nuclei to cytoplasmic (N:C) ratio

with a moderate amount of deep blue cytoplasm. Late myeloid precursors (immature neutrophils): round to ovoid to bilobed nuclei are with light purple to darker pink coloration. Slightly clumped chromatin pattern and no distinct nucleoli. Moderate N:C ratio with a blue to light blue cytoplasm. Neutrophils (mature): smaller in size than late myeloid precursors. Round to ovoid to bilobed to segmented dark purple nucleus smaller than late myeloid precursors. Moderate N:C ratio with a light blue cytoplasm and often bubbly vacuolated appearance. Macrophages: round to ovoid in shape. Nuclear shapes included round, ovoid, bilobed, and lobulated forms that have a pale pink to purple coloration. The chromatin pattern is finely stippled that occasionally has distinct nucleoli. Moderate N:C ratio that is moderately high with a blue appearance frequently vacuolated and sometimes contained melanin pigment. Lymphocytes: small round to ovoid-shaped cells. Round to ovoid-shaped nucleus, coarsely clumped chromatin pattern, and no distinct nucleoli. High N:C ratio with a scant amount of pale blue cytoplasm.

### **Peripheral blood collection and hematocrit determination**

Adult (6-11 months old) *grna*<sup>-/-</sup> and *grna*<sup>+/+</sup> control siblings were subjected to cardiocentesis for blood collection. Briefly, adult zebrafish were treated with a solution containing the anesthetic Tricaine (3-aminobenzoic acid ethyl ester; Sigma A-5040) at a concentration of 160-200mg/L for 2 minutes. Then, cardiac puncture was performed with a heparinized P10 pipette for PB collection. 4-10  $\mu$ l of PB per fish were deposited on a slide, and microcapillary tubes (Sigma-Aldrich, P1924-1PAK) were placed on top to collect the blood by capillarity. The tubes were sealed with critoseal (McCormick scientific, 215003), and the samples were placed on ice until analyzed as followed. The microcapillary tubes were centrifuged for three minutes in a microhematocrit centrifuge at 13.3 RPM (Sorvall Legend Micro 17). The hematocrit was evaluated using a microcapillary tube

reader (IEC International) by a board-certified clinical pathologist. Markedly hemolyzed samples were rejected.

### ***CUT&RUN***

Adult wild type AB\* zebrafish between three to nine months old were anesthetized in tricaine, subjected to cardiocentesis and kidney dissection as previously described<sup>3</sup>. The resulting kidney suspension was gently triturated with a P1000 pipette and filtered with a 30µm cell strainer (Thermo Fisher Scientific, NC9084441). 90,000 -120,000 cells were used per condition to perform CUT&RUN using CUT&RUN assay kit (86652S, Cell signaling) with an anti zebrafish Pu.1 antibody (GTX128266, GeneTex) (4 µl) or rabbit (DA1E) IgG Isotype control antibody (as recommended in kit protocol) following the manufacturer instructions with the following modifications: Digitonin dilution 5:1000. Incubation time for primary antibody: 10 hours at +4°C; for pAGMase: 1 hour at +4°C. Digestion time: 30 min.

To identify potential binding sites for Pu.1 in the promoter and enhancer regions of *grna*, the entire *grna* gene sequence plus 10Kb 5' upstream *grna* were subjected to Pu.1 binding sites prediction using Consite (<http://consite.genereg.net/>) and Tomtom (<http://meme-suite.org/tools/tomtom>). The transcription factor binding profile matrix for Pu.1 ID: MA0080.4 from JASPAR was utilized when using Tomtom, and user defined profile (<http://jaspar.genereg.net/matrix/MA0080.4/>) and 70% identity analyses were used for Consite. The fragment located at +23765 from the *grna* ATG start codon was used as a control, since it lacked any predicted binding sites for Pu.1.

### ***RNA sequencing***

Adult *grna*<sup>-/-</sup> and *grna*<sup>+/+</sup> control fish (three fish per condition) were subjected to cardiocentesis and kidney dissection as described here. RNA was isolated with RNeasy (Qiagen) following the

manufacturer instructions. Total RNA was assessed for quality using an Agilent TapeStation 4200, and samples with an RNA Integrity Number (RIN) greater than 8.0 were used to generate RNA sequencing libraries using the TruSeq Stranded mRNA Sample Prep (Illumina, San Diego, CA). Samples were processed following manufacturer's instructions, starting with 50 ng of RNA and modifying RNA shear time to five minutes. Resulting libraries were multiplexed and sequenced with 75 basepair (bp) single reads (SR75) to a depth of approximately 20 million reads per sample on an Illumina HiSeq 4000. Samples were demultiplexed using bcl2fastq v2.20 Conversion Software (Illumina, San Diego, CA).

RNA-seq data was mapped to Reference Consortium Zebrafish Build 10 (UCSC Genome GRC10/danRer10; Sept 2014) using Olego<sup>14</sup> and normalized using standard analysis pipelines such as cufflinks<sup>15-17</sup>. featureCounts<sup>18</sup> from subread package is used to compute the raw read counts for each gene. TPM (Transcripts Per Millions)<sup>19,20</sup> values were computed from the raw read counts using a custom perl script and  $\log_2(\text{TPM}+1)$  is used to compute the final log-reduced expression values. DESeq2 1.26.0<sup>21</sup> R package is used to compute differentially expressed genes at 1% false discovery rate. Volcano plot and heatmap were created using python matplotlib package (version 2.1.1).

### ***Statistical analysis***

Data were analyzed by unpaired T-test in GraphPad Prism 8. In all figures, solid red bars denote the mean, and error bars represent S.E.M. \*  $p < 0.05$ , \*\*  $p < 0.01$ , \*\*\*  $p < 0.001$ , \*\*\*\*  $p < 0.0001$ , n.s. not significant, n.d. not detected.

## References

1. Solchenberger B, Russell C, Kremmer E, Haass C, Schmid B. Granulin knock out zebrafish lack frontotemporal lobar degeneration and neuronal ceroid lipofuscinosis pathology. *PLoS One*. 2015;10(3):e0118956.
2. Renshaw SA, Loynes CA, Trushell DM, Elworthy S, Ingham PW, Whyte MK. A transgenic zebrafish model of neutrophilic inflammation. *Blood*. 2006;108(13):3976-3978.
3. Traver D, Paw BH, Poss KD, Penberthy WT, Lin S, Zon LI. Transplantation and in vivo imaging of multilineage engraftment in zebrafish bloodless mutants. *Nat Immunol*. 2003;4(12):1238-1246.
4. Ellett F, Pase L, Hayman JW, Andrianopoulos A, Lieschke GJ. mpeg1 promoter transgenes direct macrophage-lineage expression in zebrafish. *Blood*. 2011;117(4):e49-56.
5. Bertrand JY, Chi NC, Santoso B, Teng S, Stainier DY, Traver D. Haematopoietic stem cells derive directly from aortic endothelium during development. *Nature*. 2010;464(7285):108-111.
6. Hall C, Flores MV, Storm T, Crosier K, Crosier P. The zebrafish lysozyme C promoter drives myeloid-specific expression in transgenic fish. *BMC Dev Biol*. 2007;7:42.
7. Chen YH, Wang YH, Chang MY, et al. Multiple upstream modules regulate zebrafish myf5 expression. *BMC Dev Biol*. 2007;7:1.
8. Ganis JJ, Hsia N, Trompouki E, et al. Zebrafish globin switching occurs in two developmental stages and is controlled by the LCR. *Dev Biol*. 2012;366(2):185-194.
9. Rhodes J, Hagen A, Hsu K, et al. Interplay of pu.1 and gata1 determines myelo-erythroid progenitor cell fate in zebrafish. *Dev Cell*. 2005;8(1):97-108.
10. Li L, Jin H, Xu J, Shi Y, Wen Z. Irf8 regulates macrophage versus neutrophil fate during zebrafish primitive myelopoiesis. *Blood*. 2011;117(4):1359-1369.
11. Li YH, Chen MH, Gong HY, et al. Progranulin A-mediated MET signaling is essential for liver morphogenesis in zebrafish. *J Biol Chem*. 2010;285(52):41001-41009.
12. Sidhwani P, Leerberg DM, Boezio GLM, et al. Cardiac function modulates endocardial cell dynamics to shape the cardiac outflow tract. *Development*. 2020;147(12).
13. Espin R, Roca FJ, Candel S, et al. TNF receptors regulate vascular homeostasis in zebrafish through a caspase-8, caspase-2 and P53 apoptotic program that bypasses caspase-3. *Dis Model Mech*. 2013;6:383-396.
14. Wu J, Anczukow O, Krainer AR, Zhang MQ, Zhang C. OLEgo: fast and sensitive mapping of spliced mRNA-Seq reads using small seeds. *Nucleic Acids Res*. 2013;41(10):5149-5163.
15. Trapnell C, Pachter L, Salzberg SL. TopHat: discovering splice junctions with RNA-Seq. *Bioinformatics*. 2009;25(9):1105-1111.
16. Trapnell C, Roberts A, Goff L, et al. Differential gene and transcript expression analysis of RNA-seq experiments with TopHat and Cufflinks. *Nat Protoc*. 2012;7(3):562-578.
17. Trapnell C, Williams BA, Pertea G, et al. Transcript assembly and quantification by RNA-Seq reveals unannotated transcripts and isoform switching during cell differentiation. *Nat Biotechnol*. 2010;28(5):511-515.
18. Liao Y, Smyth GK, Shi W. featureCounts: an efficient general purpose program for assigning sequence reads to genomic features. *Bioinformatics*. 2014;30(7):923-930.
19. Li B, Dewey CN. RSEM: accurate transcript quantification from RNA-Seq data with or without a reference genome. *BMC Bioinformatics*. 2011;12:323.
20. Pachter L. Models for transcript quantification from RNA-Seq. *arXiv*. 2011;1104.3889.
21. Love MI, Huber W, Anders S. Moderated estimation of fold change and dispersion for RNA-seq data with DESeq2. *Genome Biol*. 2014;15(12):550.
